# Supplementary material
Source: ML conference proceedings conference paper supplement (https://proceedings.mlr.press/v37/gonga15.html)
Supplement: Supplementary file [file gonga15-supp.pdf]

## Supplementary Material for “A Modified Orthant-Wise Limited Memory Quasi-Newton Method with Convergence Analysis”

### A. BFGS and L-BFGS

For self-containedness, we briefly review the update of the inverse Hessian matrix in the BFGS and L-BFGS (Jorge & Stephen, 1999). Assume that we are given an approximate inverse Hessian matrix  $H^k$  at  $\mathbf{x} = \mathbf{x}^k$ . BFGS updates the inverse Hessian matrix  $H^{k+1}$  at  $\mathbf{x} = \mathbf{x}^{k+1}$  as:

$$H^{k+1} = (V^k)^T H^k V^k + \rho^k \mathbf{s}^k (\mathbf{s}^k)^T, \quad (31)$$

where  $V^k = I - \rho^k \mathbf{y}^k (\mathbf{s}^k)^T$ ,  $\mathbf{s}^k = \mathbf{x}^{k+1} - \mathbf{x}^k$ ,  $\mathbf{y}^k = \nabla l(\mathbf{x}^{k+1}) - \nabla l(\mathbf{x}^k)$ ,  $\rho^k = ((\mathbf{y}^k)^T \mathbf{s}^k)^{-1}$ . It is easy to verify that  $H^{k+1} \succ 0$ , if  $H^k \succ 0$  and  $\rho^k > 0$  (Jorge & Stephen, 1999).

L-BFGS updates the inverse Hessian matrix by unrolling the update from BFGS back to  $m$  steps:

$$\begin{aligned} H^k &= (V^{k-1})^T H^{k-1} V^{k-1} + \rho^{k-1} \mathbf{s}^{k-1} (\mathbf{s}^{k-1})^T \\ &= (V^{k-1})^T (V^{k-2})^T H^{k-2} V^{k-2} V^{k-1} \\ &\quad + (V^{k-1})^T \mathbf{s}^{k-2} \rho^{k-2} (\mathbf{s}^{k-2})^T V^{k-1} \\ &\quad + \rho^{k-1} \mathbf{s}^{k-1} (\mathbf{s}^{k-1})^T \\ &= (U^{k,m})^T H^{k-m} U^{k,m} \\ &\quad + \rho^{k-m} (U^{k,m-1})^T \mathbf{s}^{k-m} (\mathbf{s}^{k-m})^T U^{k,m-1} \\ &\quad + \rho^{k-m+1} (U^{k,m-2})^T \mathbf{s}^{k-m+1} (\mathbf{s}^{k-m+1})^T U^{k,m-2} \\ &\quad + \dots \\ &\quad + \rho^{k-2} (V^{k-1})^T \mathbf{s}^{k-2} (\mathbf{s}^{k-2})^T V^{k-1} \\ &\quad + \rho^{k-1} \mathbf{s}^{k-1} (\mathbf{s}^{k-1})^T, \end{aligned} \quad (32)$$

where  $U^{k,m} = V^{k-m} V^{k-m+1} \dots V^{k-1}$ . For the L-BFGS, we need *not* explicitly store the approximated inverse Hessian matrix. Instead, we only require matrix-vector multiplications at each iteration, which can be implemented by a two-loop recursion with a time complexity of  $O(mn)$  (Jorge & Stephen, 1999). Thus, we only store  $2m$  vectors of length  $n$ :  $\mathbf{s}^{k-1}, \mathbf{s}^{k-2}, \dots, \mathbf{s}^{k-m}$  and  $\mathbf{y}^{k-1}, \mathbf{y}^{k-2}, \dots, \mathbf{y}^{k-m}$  with a storage complexity of  $O(mn)$ , which is very useful when  $n$  is large. In practice, L-BFGS updates  $H^{k-m}$  as  $\mu^k I$ , where  $\mu^k = (\mathbf{s}^k)^T \mathbf{y}^k / \|\mathbf{y}^k\|^2$ .

### B. Properties of L-BFGS

We first show that some key sequences are bounded, which are critical for establishing some important properties of L-BFGS.

**Proposition 6** *The sequence  $\{\mathbf{x}^k\}$  generated by the mOWL-QN algorithm is bounded. Let  $\mathbf{s}^k = \mathbf{x}^{k+1} - \mathbf{x}^k$ ,  $\mathbf{y}^k = \nabla l(\mathbf{x}^{k+1}) - \nabla l(\mathbf{x}^k)$ . Then  $\{\mathbf{s}^k\}$ ,  $\{\mathbf{y}^k\}$  and  $\{\mathbf{v}^k\}$  are also bounded.*

**Proof** Proposition 5 guarantees that both line search criteria in QN-step (Eq. (7)) and GD-step (Eq. (8)) can be satisfied in a finite number of trials with some  $\alpha^k > 0$ . By Eqs. (11), (7), (8), we have

$$\begin{aligned} f(\mathbf{x}^k) - f(\mathbf{x}^{k+1}) &\geq \gamma \alpha^k (\mathbf{v}^k)^T \mathbf{d}^k \geq 0 \text{ (QN-step),} \\ \text{or } f(\mathbf{x}^k) - f(\mathbf{x}^{k+1}) &\geq \frac{\gamma}{2\alpha^k} \|\mathbf{x}^{k+1} - \mathbf{x}^k\|^2 \geq 0 \text{ (GD-step),} \end{aligned} \quad (33)$$

which imply that  $\{f(\mathbf{x}^k)\}$  is decreasing. Hence for all  $k \geq 1$ ,  $f(\mathbf{x}^k) \leq f(\mathbf{x}^0)$ . Assume that  $\{\mathbf{x}^k\}$  is unbounded. Then there exists a subsequence  $\{\mathbf{x}^k\}_{\tilde{\mathcal{K}}}$  such that  $\{\|\mathbf{x}^k\|_1\}_{\tilde{\mathcal{K}}} \rightarrow \infty$ . Recall that  $l(\mathbf{x})$  is bounded from below (see Section 2). Thus, we have  $\{f(\mathbf{x}^k)\}_{\tilde{\mathcal{K}}} \rightarrow \infty$ , which leads to a contradiction with that  $f(\mathbf{x}^k) \leq f(\mathbf{x}^0), \forall k \geq 1$ . Therefore,  $\{\mathbf{x}^k\}$  is bounded, which immediately imply that  $\{\mathbf{s}^k\}$  is also bounded. Recalling that  $\nabla l(\mathbf{x})$  is L-Lipschitz continuous, we obtain that  $\|\mathbf{y}^k\| \leq L \|\mathbf{x}^k - \mathbf{x}^{k+1}\|$  and hence  $\{\mathbf{y}^k\}$  is bounded. Since  $-\mathbf{v}^k \in \partial f(\mathbf{x}^k)$ , then based on the Proposition B.24(b) in Bertsekas (1999), we obtain that  $\{\mathbf{v}^k\}$  is bounded.

Based on Proposition 6, we present the following important properties of L-BFGS.

**Proposition 7** *In the course of the inversion Hessian matrix update using L-BFGS, let  $\{H^0\}$  and  $\{H^{k-m}\}$  be bounded and positive definite, and  $\{\mathbf{x}^k\}$ ,  $\{\mathbf{s}^k\}$ ,  $\{\mathbf{v}^k\}$ ,  $\{\mathbf{y}^k\}$  and  $\{\rho^k\}$  be bounded, where  $\mathbf{s}^k = \mathbf{x}^{k+1} - \mathbf{x}^k$ ,  $\mathbf{y}^k = \nabla l(\mathbf{x}^{k+1}) - \nabla l(\mathbf{x}^k)$  and  $\rho^k = ((\mathbf{y}^k)^T \mathbf{s}^k)^{-1}$ . Then there exists a positive constant  $M$  such that for all  $\mathbf{x} \in \mathbb{R}^n$  and all  $k \geq 1$ :  $\mathbf{x}^T H^k \mathbf{x} \leq M \|\mathbf{x}\|^2$ . That is, the eigenvalues of  $H^k$  are uniformly bounded from above by  $M$ . Moreover,  $\{\mathbf{d}^k\}$  and  $\{\mathbf{p}^k\}$  are bounded.*

**Proof** When  $k \leq m$  ( $m$  is the unrolling steps of L-BFGS), L-BFGS is equivalent to BFGS and  $H^k$  is updated by the recursive relationship in Eq. (31). When  $k > m$ ,  $H^k$  is updated by the recursive relationship in Eq. (32). Thus, Eqs. (31), (32) and the boundedness of  $\{H^0\}$ ,  $\{H^{k-m}\}$ ,  $\{\mathbf{s}^k\}$ ,  $\{\mathbf{y}^k\}$ ,  $\{\mathbf{v}^k\}$  and  $\{\rho^k\}$  immediately imply that  $\{\|H^k\|_F\}$  is bounded. That is, there exist an  $M > 0$  such that  $\|H^k\|_F \leq M$  for all  $k \geq 1$ . Thus, for all  $k \geq 1$ ,  $\lambda_{\max}(H^k) \leq \|H^k\|_F \leq M$ , where  $\lambda_{\max}(H^k)$  is the largest eigenvalue of  $H^k$ . That is, there exists a positive constant  $M$  such that for all  $\mathbf{x} \in \mathbb{R}^n$  and all  $k \geq 1$ :  $\mathbf{x}^T H^k \mathbf{x} \leq M \|\mathbf{x}\|^2$ . Thus, the eigenvalues of  $H^k$  are uniformly bounded from above by  $M$ . It easily follows that  $\{\mathbf{d}^k\}$  and  $\{\mathbf{p}^k\}$  are bounded by noticing that  $\{\mathbf{v}^k\}$  is bounded.

**Remark 4** *We discuss how to guarantee that the conditions in Proposition 7 are satisfied in practical L-BFGS updates. We usually choose  $H^0$  and  $H^{k-m}$  as multiple identity matrices such that  $\{H^0\}$  and  $\{H^{k-m}\}$  are bounded and positive definite. Proposition 6 guarantees that  $\{\mathbf{x}^k\}$ ,  $\{\mathbf{s}^k\}$ ,  $\{\mathbf{v}^k\}$  and  $\{\mathbf{y}^k\}$  are bounded. To guarantee that  $\{\rho^k\}$  is also bounded, we adopt a similar strategy presented in Byrd et al. (1995); Andrew & Gao (2007): choose a small positive constant  $\delta$  and perform L-BFGS updates only when  $(\mathbf{s}^k)^T \mathbf{y}^k \geq \delta$ .*

**Remark 5** *To guarantee the eigenvalues of  $H^k$  are uniformly bounded from below by a positive constant, we can add a small positive diagonal matrix  $\nu I$  to  $H^k$  (e.g.,  $\nu = 10^{-12}$ ). Thus, the eigenvalues of  $H^k$  are both uniformly bounded from below by  $\nu$  and uniformly bounded from above by  $M$ , respectively.*

### C. Proof of Proposition 5 and Auxiliary Propositions

We present the following proposition which is useful to prove Proposition 5.

**Proposition 8** *At the point  $\mathbf{x} = \mathbf{x}^k$  with the vector  $\mathbf{v}^k = -\diamond f(\mathbf{x}^k)$ , if  $\mathbf{p}^k = \pi(\mathbf{d}^k; \mathbf{v}^k)$  is a non-zero vector, then  $f'(\mathbf{x}^k; \mathbf{p}^k) = -(\mathbf{v}^k)^T \mathbf{p}^k < 0$ , where  $f'(\mathbf{x}^k; \mathbf{p}^k)$  denotes the directional derivative of  $f(\mathbf{x})$  at  $\mathbf{x} = \mathbf{x}^k$  along the direction  $\mathbf{p}^k$  defined as follows:*

$$f'(\mathbf{x}^k; \mathbf{p}^k) = \lim_{\alpha \downarrow 0} \frac{f(\mathbf{x}^k + \alpha \mathbf{p}^k) - f(\mathbf{x}^k)}{\alpha}. \quad (34)$$

**Proof** According to the property of the directional derivative of a convex function (Bertsekas, 1999), we have

$$f'(\mathbf{x}^k; \mathbf{p}^k) = \max_{\mathbf{g}^k \in \partial f(\mathbf{x}^k)} (\mathbf{g}^k)^T \mathbf{p}^k = \sum_{i=1}^n \max_{g_i^k \in \partial_i f(\mathbf{x}^k)} g_i^k p_i^k.$$

Noticing that  $\diamond_i f(\mathbf{x}^k) = \nabla_i l(\mathbf{x}^k) + \lambda \sigma(x_i^k)$  is the unique element of  $\partial_i f(\mathbf{x}^k)$  whenever  $x_i^k \neq 0$ , we have

$$\begin{aligned} f'(\mathbf{x}^k; \mathbf{p}^k) &= \sum_{i \in \mathcal{A}_k} \diamond_i f(\mathbf{x}^k) p_i^k + \sum_{i \in \mathcal{A}_k^c} \max_{g_i^k \in \partial_i f(\mathbf{x}^k)} g_i^k p_i^k. \\ &= \sum_{i \in \mathcal{A}_k} \diamond_i f(\mathbf{x}^k) p_i^k + \sum_{i \in \mathcal{A}_k^c} \max_{g_i^k \in \partial_i f(\mathbf{x}^k)} g_i^k \sigma(v_i^k) |p_i^k|, \end{aligned}$$

where  $\mathcal{A}_k = \{i : x_i^k \neq 0\}$ ,  $\mathcal{A}_k^c = \{i : x_i^k = 0\}$  and the last equality is due to  $p_i^k = \pi_i(d_i^k; v_i^k)$ . We now focus on  $x_i^k = 0$  in the following three cases:

- (1) If  $v_i^k > 0$ , then  $\diamond_i f(\mathbf{x}^k) = \nabla_i l(\mathbf{x}^k) + \lambda < 0$  and hence  $\nabla_i l(\mathbf{x}^k) - \lambda \leq g_i^k \leq \nabla_i l(\mathbf{x}^k) + \lambda < 0$ . Thus, we should choose  $g_i^k = \diamond_i f(\mathbf{x}^k)$  to make  $g_i^k \sigma(v_i^k) |p_i^k|$  achieve the maximum value.
- (2) If  $v_i^k < 0$ , then  $\diamond_i f(\mathbf{x}^k) = \nabla_i l(\mathbf{x}^k) - \lambda > 0$  and hence  $0 < \nabla_i l(\mathbf{x}^k) - \lambda \leq g_i^k \leq \nabla_i l(\mathbf{x}^k) + \lambda$ . Thus, we should choose  $g_i^k = \diamond_i f(\mathbf{x}^k)$  to make  $g_i^k \sigma(v_i^k) |p_i^k|$  achieve the maximum value.

(3) If  $v_i^k = 0$ , then  $g_i^k \sigma(v_i^k) |p_i^k| = 0$  for any  $g_i^k \in \partial_i f(\mathbf{x}^k)$ .

Combining the above three cases, we have:

$$\begin{aligned} f'(\mathbf{x}^k; \mathbf{p}^k) &= \sum_{i \in \mathcal{A}_k} \diamond_i f(\mathbf{x}^k) p_i^k + \sum_{i \in \mathcal{A}_k^c} \diamond_i f(\mathbf{x}^k) \sigma(v_i^k) |p_i^k| \\ &= \sum_{i \in \mathcal{A}_k} \diamond_i f(\mathbf{x}^k) p_i^k + \sum_{i \in \mathcal{A}_k^c} \diamond_i f(\mathbf{x}^k) p_i^k \\ &= \diamond f(\mathbf{x}^k)^T \mathbf{p}^k = -(\mathbf{v}^k)^T \mathbf{p}^k < 0, \end{aligned}$$

where the last inequality follows from that  $\mathbf{p}^k = \pi(\mathbf{d}^k; \mathbf{v}^k)$  and the condition  $\mathbf{p}^k \neq \mathbf{0}$ .

Based on Proposition 8, we prove Proposition 5 as follows:

**Proposition 5** (a) For QN-step, let's define

$$\mathcal{B}_k = \{i : x_i^k p_i^k < 0\} \text{ and } \bar{\alpha}_1^k = \begin{cases} \min_{i \in \mathcal{B}_k} \frac{|x_i^k|}{|p_i^k|}, & \text{if } \mathcal{B}_k \neq \emptyset, \\ +\infty, & \text{otherwise.} \end{cases}$$

Then for all  $\alpha \in (0, \bar{\alpha}_1^k)$ , we have

$$\mathbf{x}^k(\alpha) = \pi(\mathbf{x}^k + \alpha \mathbf{p}^k; \boldsymbol{\xi}^k) = \mathbf{x}^k + \alpha \mathbf{p}^k. \quad (35)$$

Define

$$s(\alpha) = f(\mathbf{x}^k + \alpha \mathbf{p}^k), \quad h(\alpha) = \frac{s(\alpha) - s(0)}{\alpha}.$$

Since  $f$  is convex,  $s(\alpha)$  is convex. Let  $0 < \alpha \leq \alpha'$ . Then the convexity of  $s(\alpha)$  leads to

$$s(\alpha) \leq \frac{\alpha}{\alpha'} s(\alpha') + \frac{\alpha' - \alpha}{\alpha'} s(0).$$

Thus,

$$\frac{s(\alpha) - s(0)}{\alpha} \leq \frac{s(\alpha') - s(0)}{\alpha'},$$

which indicates that  $h(\alpha)$  is an increasing function in the interval  $(0, \infty)$ . Recalling the definition of the directional derivative in Eq. (34),  $\gamma \in (0, 1)$  and Proposition 8, we have

$$\lim_{\alpha \downarrow 0} \frac{s(\alpha) - s(0)}{\alpha} = -(\mathbf{v}^k)^T \mathbf{p}^k \leq -(\mathbf{v}^k)^T \mathbf{d}^k < -\gamma (\mathbf{v}^k)^T \mathbf{d}^k,$$

where the first inequality follows from Eq. (11) and the last inequality follows from  $\gamma \in (0, 1)$  and  $(\mathbf{v}^k)^T \mathbf{d}^k > 0$  whenever  $\mathbf{x}^k$  is not a global minimizer of problem (1) [see Eq. (11) and Proposition 9]. Thus, there exists an  $\bar{\alpha}_2^k \in (0, \min(\alpha_0, \bar{\alpha}_1^k))$  such that

$$\frac{s(\alpha) - s(0)}{\alpha} \leq -\gamma (\mathbf{v}^k)^T \mathbf{d}^k, \quad \forall 0 < \alpha \leq \bar{\alpha}_2^k. \quad (36)$$

Recall that  $h(\alpha)$  is continuous and increasing in the interval  $(0, \infty)$ . Thus, considering Eq. (36) and the backtracking form of the line search in QN-step (Eq. (7)), there exists an  $\alpha$  with  $\alpha \geq \bar{\alpha}^k = \beta \bar{\alpha}_2^k > 0$  such that

$$\frac{s(\alpha) - s(0)}{\alpha} \leq -\gamma (\mathbf{v}^k)^T \mathbf{d}^k. \quad (37)$$

Substituting the definition of  $s(\alpha)$  into Eq. (37) and considering that Eq. (35) holds for all  $\alpha \in (0, \bar{\alpha}_1^k)$ , we obtain that there exists an  $\alpha \in [\bar{\alpha}^k, \alpha_0]$  such that the line search criterion in Eq. (7) is satisfied.

(b) For GD-step, we have

$$\nabla l(\mathbf{x}^k)^T (\mathbf{x}^k(\alpha) - \mathbf{x}^k) + \frac{1}{2\alpha} \|\mathbf{x}^k(\alpha) - \mathbf{x}^k\|^2 + \lambda \|\mathbf{x}^k(\alpha)\|_1 \leq \lambda \|\mathbf{x}^k\|_1. \quad (38)$$

Noticing that  $\nabla l(\mathbf{x})$  is Lipschitz continuous with constant  $L$ , we have

$$l(\mathbf{x}^k(\alpha)) \leq l(\mathbf{x}^k) + \nabla l(\mathbf{x}^k)^T (\mathbf{x}^k(\alpha) - \mathbf{x}^k) + \frac{L}{2} \|\mathbf{x}^k(\alpha) - \mathbf{x}^k\|^2,$$

which together with Eq. (38) and  $f(\mathbf{x}) = l(\mathbf{x}) + \lambda \|\mathbf{x}\|_1$  implies that

$$f(\mathbf{x}^k(\alpha)) \leq f(\mathbf{x}^k) - \frac{1 - \alpha L}{2\alpha} \|\mathbf{x}^k(\alpha) - \mathbf{x}^k\|^2.$$

Thus, the line search in Eq. (8) is satisfied if

$$\gamma \leq 1 - \alpha L \text{ and } 0 < \alpha \leq \alpha_0.$$

Considering the backtracking form of the line search in GD-step (Eq. (8)), we obtain that the line search criterion in Eq. (8) is satisfied whenever  $\alpha \geq \beta \min(\alpha_0, (1 - \gamma)/L)$ .

#### D. More Optimality Conditions for Problem (1)

**Proposition 9** Let  $\mathbf{d}^k = H^k \mathbf{v}^k$ ,  $\mathbf{p}^k = \pi(\mathbf{d}^k; \mathbf{v}^k)$ ,  $\mathbf{q}_\alpha^k = \frac{1}{\alpha} (\pi(\mathbf{x}^k + \alpha \mathbf{p}^k; \boldsymbol{\xi}^k) - \mathbf{x}^k)$ . Then for all  $\alpha \in (0, \infty)$ ,  $\mathbf{x}^k$  is a global minimizer of problem (1)  $\Leftrightarrow \mathbf{d}^k = \mathbf{0} \Leftrightarrow \mathbf{v}^k = \mathbf{0} \Leftrightarrow \mathbf{p}^k = \mathbf{0} \Leftrightarrow \mathbf{q}_\alpha^k = \mathbf{0}$ .

**Proof** Based on Proposition 3 and its proof, we know that  $\mathbf{x}^k$  is a global minimizer of problem (1) if and only if  $\mathbf{v}^k = \mathbf{0}$ . Thus, we only need to prove the following equivalence to complete the proof of Proposition 9:

$$\mathbf{d}^k = \mathbf{0} \Leftrightarrow \mathbf{v}^k = \mathbf{0} \Leftrightarrow \mathbf{p}^k = \mathbf{0} \Leftrightarrow \mathbf{q}_\alpha^k = \mathbf{0}.$$

(i) We first prove  $\mathbf{d}^k = \mathbf{0} \Leftrightarrow \mathbf{v}^k = \mathbf{0}$ .

This equivalence immediately follows from that  $\mathbf{d}^k = H^k \mathbf{v}^k$  and  $H^k$  is positive definite.

(ii) We next prove  $\mathbf{v}^k = \mathbf{0} \Leftrightarrow \mathbf{p}^k = \mathbf{0}$ .

- If  $\mathbf{v}^k = \mathbf{0}$ , then  $\mathbf{p}^k = \mathbf{0}$  by the definition of  $\mathbf{p}^k$ .
- If  $\mathbf{p}^k = \mathbf{0}$ , then for all  $i \in \{1, \dots, n\}$ ,  $d_i^k v_i^k \leq 0$  by the definition of  $\mathbf{p}^k$ . Thus, we have

$$(\mathbf{v}^k)^T H^k \mathbf{v}^k = \sum_{i=1}^n d_i^k v_i^k \leq 0.$$

On the other hand, due to the positive definiteness of  $H^k$ , we have

$$(\mathbf{v}^k)^T H^k \mathbf{v}^k \geq 0.$$

Thus,  $(\mathbf{v}^k)^T H^k \mathbf{v}^k = 0$  and hence  $\mathbf{v}^k = \mathbf{0}$ .

(iii) We finally prove  $\mathbf{p}^k = \mathbf{0} \Leftrightarrow \mathbf{q}_\alpha^k = \mathbf{0}$ .

- If  $\mathbf{p}^k = \mathbf{0}$ , then  $\mathbf{q}_\alpha^k = \frac{1}{\alpha} (\pi(\mathbf{x}^k; \boldsymbol{\xi}^k) - \mathbf{x}^k)$ . We consider the following two cases:
  - (1) If  $x_i^k = 0$ , then  $(q_\alpha^k)_i = (0 - 0)/\alpha = 0$ .
  - (2) If  $x_i^k \neq 0$ , then  $(q_\alpha^k)_i = (x_i^k - x_i^k)/\alpha = 0$ .

Combing the above two cases, we obtain that  $\mathbf{q}_\alpha^k = \mathbf{0}$ .

• If  $\mathbf{q}_\alpha^k = \mathbf{0}$ , then  $\pi(\mathbf{x}^k + \alpha \mathbf{p}^k; \boldsymbol{\xi}^k) = \mathbf{x}^k$ . We consider the following two cases:

- (1) If  $x_i^k = 0$ , then  $\pi_i(x_i^k + \alpha p_i^k; \xi_i^k) = 0$ . Thus,  $(0 + \alpha p_i^k) \xi_i^k = \alpha p_i^k \sigma(v_i^k) \leq 0$ , which together with  $p_i^k = \pi_i(d_i^k; v_i^k)$  implies  $p_i^k \sigma(v_i^k) = |p_i^k| \leq 0$ . Therefore,  $p_i^k = 0$ .
- (2) If  $x_i^k \neq 0$ , then  $\pi_i(x_i^k + \alpha p_i^k; \xi_i^k) = x_i^k$ . By the definition of  $\pi_i(\cdot)$ , we have  $\pi_i(x_i^k + \alpha p_i^k; \xi_i^k) = x_i^k + \alpha p_i^k$  or  $0$ . Thus, by recalling that  $x_i^k \neq 0$  and  $\pi_i(x_i^k + \alpha p_i^k; \xi_i^k) = x_i^k$ , we must have  $x_i^k + \alpha p_i^k = x_i^k$ . Therefore,  $p_i^k = 0$ .

Combing the above two cases, we obtain that  $\mathbf{p}^k = \mathbf{0}$ .
